# Supplementary material
Source: MDPI journal article supplement (https://www.mdpi.com/2073-4352/13/11/1602)
Supplement: s1 [file s1]

## Supporting Information for

# **Type-II GaSe/MoS<sub>2</sub> van der Waals Heterojunction for High-performance Flexible Photodetector**

Shuai Wang <sup>‡1</sup>, Xiaoqiu Tang <sup>‡1</sup>, Ezimetjan Alim <sup>1</sup>, Xingdong Sun <sup>1</sup>, Zheng Wei <sup>\*1</sup>, Hualong Tao <sup>1</sup>, Yang Wen <sup>1</sup>, Sumei Wu <sup>1</sup>, Yongqing Cai <sup>2</sup>, Yingying Wang <sup>3</sup>, Yao Liang <sup>1</sup> and Zhihua Zhang <sup>1</sup>

<sup>1</sup> School of Materials Science and Engineering, Dalian Jiaotong University, Dalian 116028, China

<sup>2</sup> Shenzhen Institute for Quantum Science and Engineering, Southern University of Science and Technology, Shenzhen 518055, China

<sup>3</sup> Department of Optoelectronic Science, Harbin Institute of Technology at Weihai, Weihai 264209, China

\* Correspondence: zhengwei@djtu.edu.cn

‡ These authors contributed equally to this work.

### **(1) Structure and energy spectrum characterization of the GaSe/MoS<sub>2</sub> heterojunction**

To discern the fine morphology characterization and elemental composition analysis of the GaSe/MoS<sub>2</sub> van der Waals heterojunction, we have provided the TEM, HRTEM and EDS mapping images of the sample. Figure S1(a) presents the TEM image of the GaSe/MoS<sub>2</sub> van der Waals heterojunction with GaSe on the lower layer and MoS<sub>2</sub> on the upper layer, and the dotted line indicates the edge of MoS<sub>2</sub>. It is obvious that the sample shows a clean surface and sharp interface. The HRTEM image of the heterojunction region is shown in Figure S1(b) and the Moire patterns are clearly visible. Figure S1(c-f) are the EDS mapping images of the GaSe/MoS<sub>2</sub> van der Waals heterojunction in Figure S1(a). The signals of the S and Mo elements are detected in the MoS<sub>2</sub> region and the Se and Ga elements appear in the entire area of the sample, which is in accordance with the structure of the heterojunction.

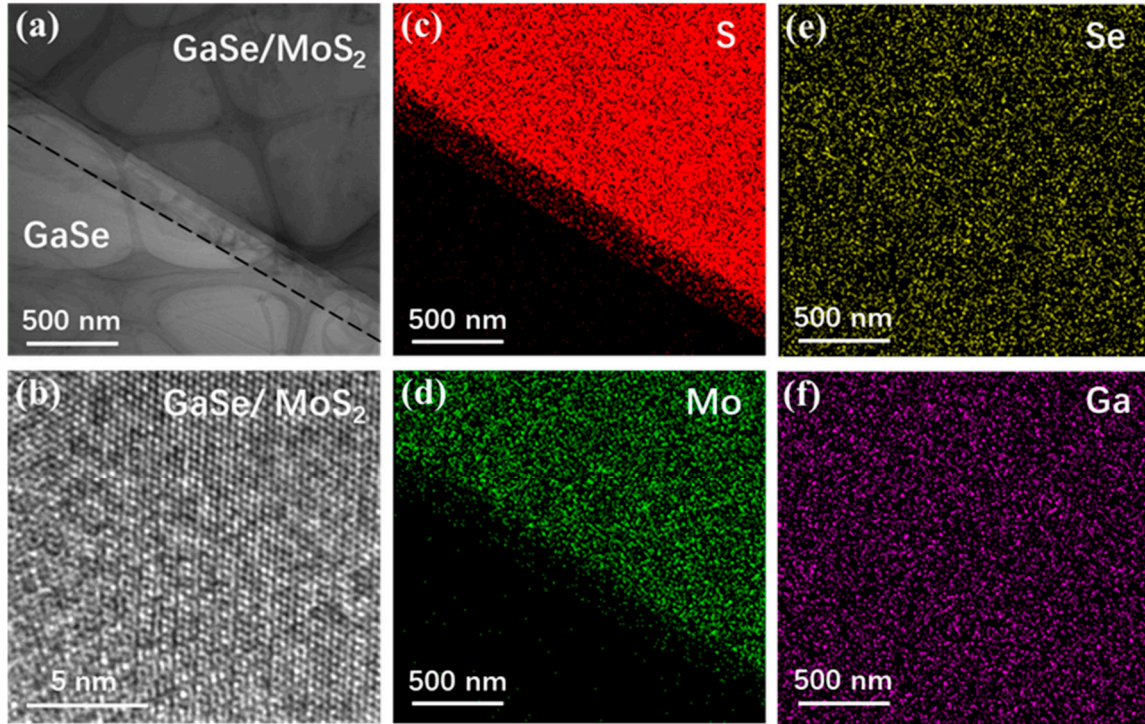

Figure S1. Structure and energy spectrum characterization of the GaSe/MoS<sub>2</sub> van der Waals heterojunction. (a,b) TEM and HRTEM images of the GaSe/MoS<sub>2</sub> van der Waals heterojunction, respectively. (c-f) EDS mapping images of the GaSe/MoS<sub>2</sub> van der Waals heterojunction.

## (2) Crystal structures and energy-band diagrams of MoS<sub>2</sub> and GaSe

The schematic diagrams of the MoS<sub>2</sub> and GaSe crystal structures are illustrated in Figure S2(a). Monolayer MoS<sub>2</sub> and GaSe are formed by vertically stacked S-Mo-S atomic layers and Se-Ga-Ga-Se atomic layers, respectively, while the bulk crystals are composed of vertical stacking of their monolayers with vdW force between the interfaces. The energy-band diagrams of separated MoS<sub>2</sub> and GaSe are presented in Figure S2(b).  $E_0$ ,  $E_c$  and  $E_v$  denote the vacuum energy level, minimum conduction band and maximum valence band, respectively. The electron affinity of MoS<sub>2</sub> is  $\sim 4.1$  eV, whereas that of GaSe is  $\sim 2.8$  eV [1,2]. The valence band maximum of MoS<sub>2</sub> is 0.5 eV lower than that of GaSe, which indicates that the vertically stacked GaSe/MoS<sub>2</sub> vdW heterostructure generates a type-II band alignment, with the minimum conduction band corresponding to MoS<sub>2</sub> and the maximum valence band corresponding to GaSe.

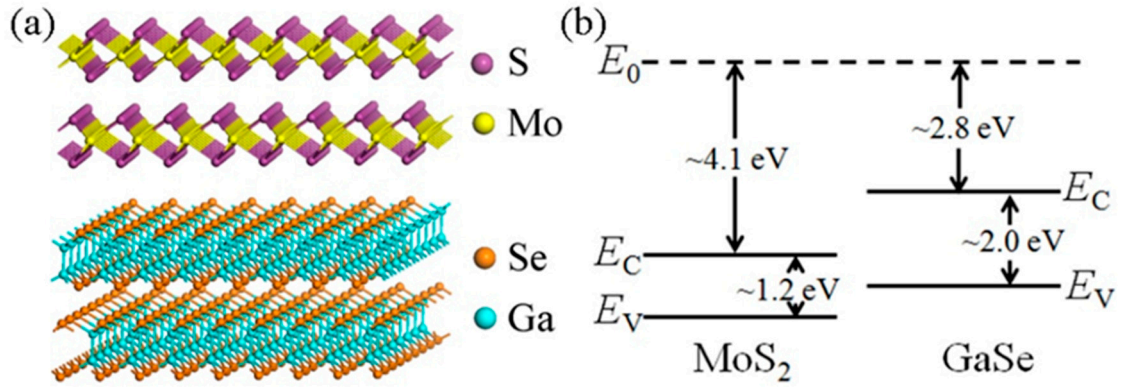

Figure S2. Crystal structures and energy-band diagrams of separated MoS<sub>2</sub> and GaSe. (a) Schematic diagrams of MoS<sub>2</sub> and GaSe crystal structures. (b) Energy-band diagrams of separated MoS<sub>2</sub> and GaSe.

### (3) Fabrication process of GaSe/MoS<sub>2</sub> photodetector

Figure S3 depicts the preparation procedure of the GaSe/MoS<sub>2</sub> vdW heterostructure photodetector. The OM image of the GaSe nanosheet on the SiO<sub>2</sub> (300 nm)/Si substrate is presented in Figure S3(a). Note that the GaSe nanosheet is partially removed from the SiO<sub>2</sub>/Si substrate after being spin-coated and peeled off with PPC, as demonstrated in Figure S3(b) for the remaining part of the GaSe sample. The AFM image of the remaining part of the GaSe nanosheet is shown in Figure S3(c). The height profile reveals that the GaSe nanosheet has a thickness of ~ 24.7 nm. The GaSe nanosheet was then transferred to the Au electrodes on the PET substrate, which is shown in Figure S3(d). The OM image of the MoS<sub>2</sub> nanosheet on the SiO<sub>2</sub> (300 nm)/Si substrate is presented in Figure S3(e). Figure S3(f) shows the AFM image of the MoS<sub>2</sub> nanosheet and the thickness of the MoS<sub>2</sub> nanosheet is ~ 170 nm. The fabrication of the GaSe/MoS<sub>2</sub> photodetector is achieved after the transfer of the MoS<sub>2</sub> nanosheet onto to the GaSe and Au electrodes on the PET substrate, which is presented in Figure 3c.

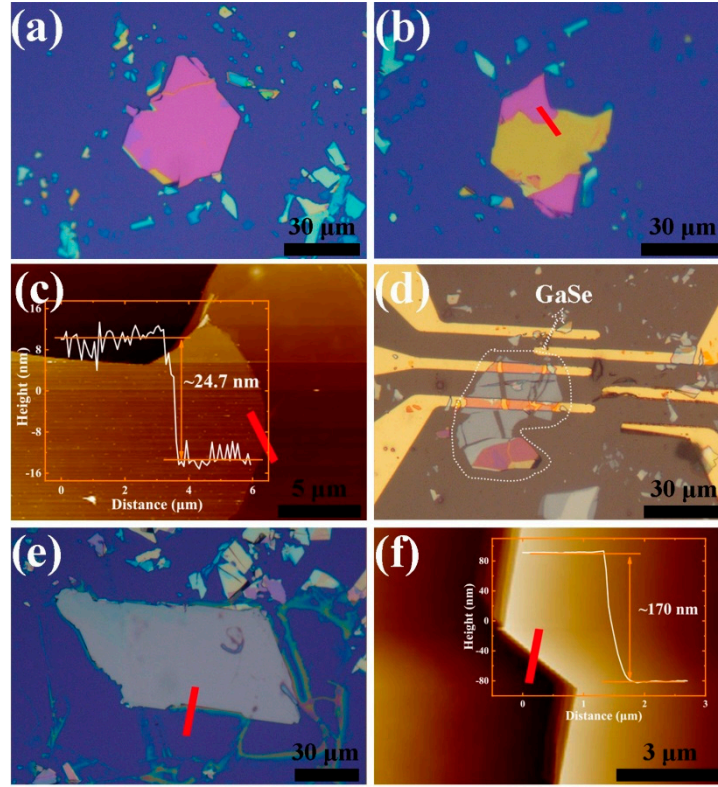

Figure S3. The fabrication process of the GaSe/MoS<sub>2</sub> vdW heterostructure photodetector. (a) OM image of the GaSe nanosheet on the SiO<sub>2</sub> (300 nm)/Si substrate. (b) OM image of the remaining sample after the GaSe nanosheet was removed with PPC. (c) AFM image of the remaining part of the GaSe nanosheet. Inset is the height profile. (d) OM image of the GaSe nanosheet transferred to the Au electrodes on PET substrate. (e) OM image of the MoS<sub>2</sub> nanosheet on the SiO<sub>2</sub> (300 nm)/Si substrate. (f) AFM image of the MoS<sub>2</sub> nanosheet. Inset is the height profile.

#### (4) Photoresponse of the GaSe photodetector

Figure S4(a) is the I-V curves of the GaSe photodetector in the dark and under 450 nm illumination with 0.36, 1.17 and 4.90 mW/mm<sup>2</sup> light power densities. These curves are comparable to the I-V curves in Figure 4a. In the meantime, the GaSe photodetector is sensitive to variations in light intensity. The number of photogenerated carriers and the current of the photodetector both increase as the light power density rises. Figure S4(b) depicts the single-cycle temporal photoresponse of the device at a bias of 2 V while switching 450 nm light with the light power density of 4.90 mW/mm<sup>2</sup>. The device has a rapid response speed. In this case, the response time and recovery time are defined as the amount of time necessary for 10% of the photocurrent value to increase to 90% and for 90% of the photocurrent value to decrease to 10%, respectively. Consequently, both the response time and recovery time are 40 ms. It is notable that due to the accuracy of the measuring equipment, the response time and the recovery time were not precisely measured, and the actual values may be less than 40 ms.

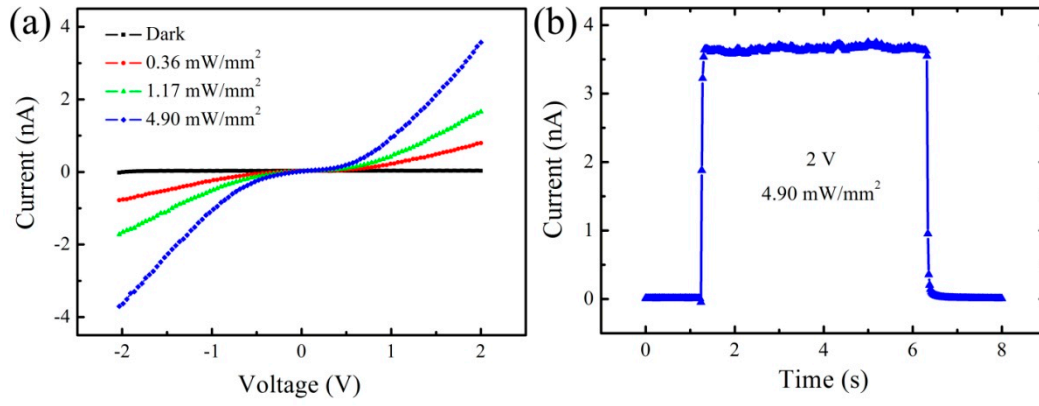

Figure S4. Photoresponse of the GaSe photodetector. (a) I-V curves in the dark and under 450 nm light illumination with different light power densities. (b) Single-cycle temporal photoresponse of the device at 2 V by switching 450 nm light with 4.90 mW/mm<sup>2</sup> light power density.

### (5) Photoresponse of the MoS<sub>2</sub> photodetector

In Figure S5(a), the I-V curves of the MoS<sub>2</sub> photodetector are shown in the dark and under 450 nm light illumination with 0.36, 1.17 and 4.90 mW/mm<sup>2</sup> light power densities. These curves are similar to the I-V curves seen in Figure 5a. Additionally, the MoS<sub>2</sub> photodetector is sensitive to variations in light intensity. Figure S5(b) depicts the single-cycle temporal photoresponse of the device at a bias of 2 V while switching 450 nm light with the light power density of 4.90 mW/mm<sup>2</sup>. The device also features a rapid response speed, with both the response time and recovery time being 40 ms.

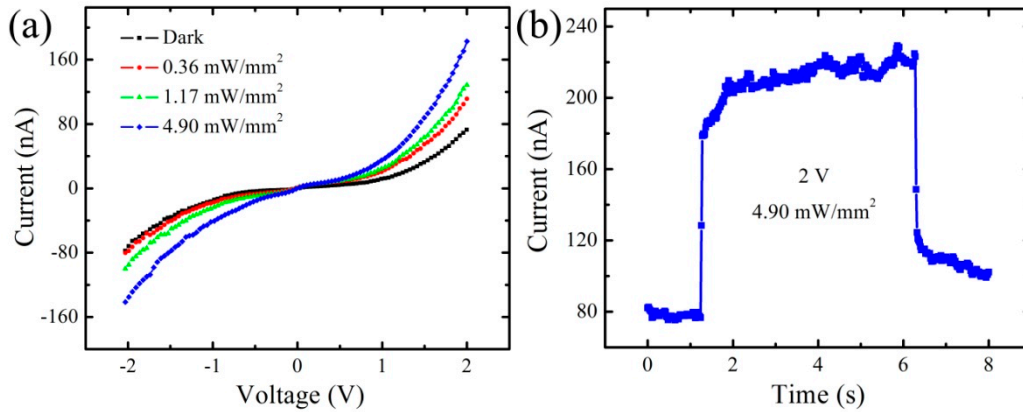

Figure S5. Photoresponse of the MoS<sub>2</sub> photodetector. (a) I-V curves in the dark and under 450 nm light illumination with different light power densities. (b) Single-cycle temporal photoresponse of the device at 2 V by switching 450 nm light with 4.90 mW/mm<sup>2</sup> light power density.

### (6) Photoresponse of the GaSe/MoS<sub>2</sub> vdW heterojunction photodetector

Figure S6(a) depicts the I-V curves of the GaSe/MoS<sub>2</sub> vdW heterojunction photodetector in the dark and under 450 nm light illumination with 0.36, 1.17 and 4.90 mW/mm<sup>2</sup> light power densities. These curves are analogous to the I-V curves seen in Figure 6a. In addition,



the GaSe/MoS<sub>2</sub> vdW heterojunction photodetector exudes a high sensitivity to variations in light intensity. Figure S6(b) shows the single-cycle temporal photoresponse of the device at a bias of 2 V, switching 450 nm light with the light power density of 4.90 mW/mm<sup>2</sup>. The GaSe/MoS<sub>2</sub> vdW heterojunction photodetector shows fast switching speed with a response time and recovery time of about 20 ms.

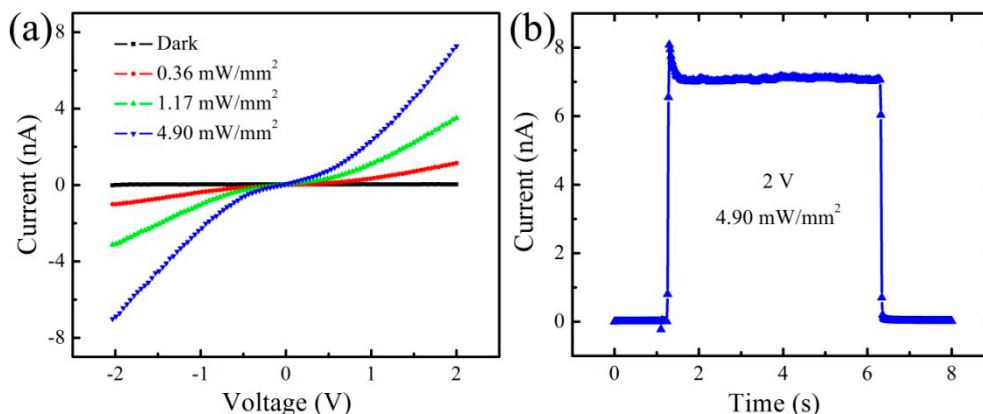

Figure S6. Photoresponse of the GaSe/MoS<sub>2</sub> vdW heterojunction photodetector. (a) I-V curves in the dark and under 450 nm light illumination with different light power densities. (b) Single-cycle temporal photoresponse of the device at 2 V by switching 450 nm light with 4.90 mW/mm<sup>2</sup> light power density.

## (7) Comparison of photoelectric properties

The comparison table of photoelectric properties for individual GaSe, MoS<sub>2</sub> and GaSe/MoS<sub>2</sub> vdW heterostructure including responsivity, on-off ratio, detectivity and response/recovery time is presented in Table S1.

Table S1. Comparison of photoelectric properties for individual GaSe, MoS<sub>2</sub> and GaSe/MoS<sub>2</sub> vdW heterostructure.

| Type                   | Responsivity<br>(mA W <sup>-1</sup> ) | On-off ratio | Detectivity<br>(Jones) | Response/Recovery<br>time (ms) |
|------------------------|---------------------------------------|--------------|------------------------|--------------------------------|
| GaSe                   | 10.5                                  | 225          | $4.74 \times 10^7$     | 40/40                          |
| MoS <sub>2</sub>       | 2496.8                                | 2.3          | $1.07 \times 10^8$     | 40/40                          |
| GaSe/ MoS <sub>2</sub> | 22.6                                  | 380          | $8.54 \times 10^7$     | 20/20                          |

## (8) Comparison of photoelectric properties with those in other related literatures

The comparison of the photoelectric performances of the GaSe/MoS<sub>2</sub> heterostructure, individual MoS<sub>2</sub> and GaSe devices in this paper with those in other related literatures are listed in Table S2. The photodetectors in this work show comparable performances with those in the previous reported papers. It is notable that the photodetectors in this work are fabricated on the flexible PET substrates, showing the efficiency in the flexible situation compared with

other ones.

Table S2. Comparison of photoelectric performances with those in other related literatures.

| Channel material            | Wavelength<br>(nm) | Responsivity<br>(mA W <sup>-1</sup> ) | Detectivity<br>(Jones) | Response<br>time | Ref.      |
|-----------------------------|--------------------|---------------------------------------|------------------------|------------------|-----------|
| GaSe/MoS <sub>2</sub>       | 300                | ~60                                   | /                      | 80 ms            | [3]       |
| GaSe/ MoS <sub>2</sub>      | 520                | ~670                                  | ~2.3×10 <sup>11</sup>  | 155 μs           | [4]       |
| GaSe/ MoS <sub>2</sub>      | 520                | ~37                                   | ~1.9×10 <sup>10</sup>  | 620 μs           | [4]       |
| GaSe/ MoS <sub>2</sub>      | 450                | ~900                                  | 6.5 × 10 <sup>9</sup>  | 5 ms             | [5]       |
| GaSe/ MoS <sub>2</sub>      | 450                | 22.6                                  | 8.54×10 <sup>7</sup>   | 20 ms            | This work |
| MoS <sub>2</sub> (40-60 nm) | 532                | ~59000                                | /                      | 42 μs            | [6]       |
| MoS <sub>2</sub> (~0.8 nm)  | 550                | ~7.5                                  | /                      | 50 ms            | [7]       |
| MoS <sub>2</sub> (~170 nm)  | 450                | 2496.8                                | 1.07×10 <sup>8</sup>   | 40 ms            | This work |
| GaSe (~4 nm)                | 254                | ~2800                                 | /                      | 20 ms            | [8]       |
| GaSe (~6 nm)                | 520                | ~2200                                 | /                      | 30 ms            | [9]       |
| GaSe (~24.7 nm)             | 450                | 10.5                                  | 4.74×10 <sup>7</sup>   | 40 ms            | This work |

### (9) Stability of the GaSe/MoS<sub>2</sub> photodetector

In order to demonstrate the long-term stability of the GaSe/MoS<sub>2</sub> vdW heterojunction photodetector, we performed the photoelectric performance test for the device. Note that we measured the same photodetector twice. The pristine test was performed immediately after the fabrication of the device, while the secondary test was carried out after testing the device for a period of time under various testing environments. Figure S7(a) presents the comparison of I-V curves between a pristine test and a secondary test under the same incident light with the wavelength of 450 nm. Comparison of the temporal photoresponse for the two tests at a bias of 2 V by switching the incident light is shown in Figure S7(b). Compared with the pristine test of the device, the current under incident light shows a decreased trend during the secondary test, which may result from the increased defects during the measurement. Despite the decrease of current, the temporal photoresponse of the heterojunction device is distinct and stable by switching the incident light.

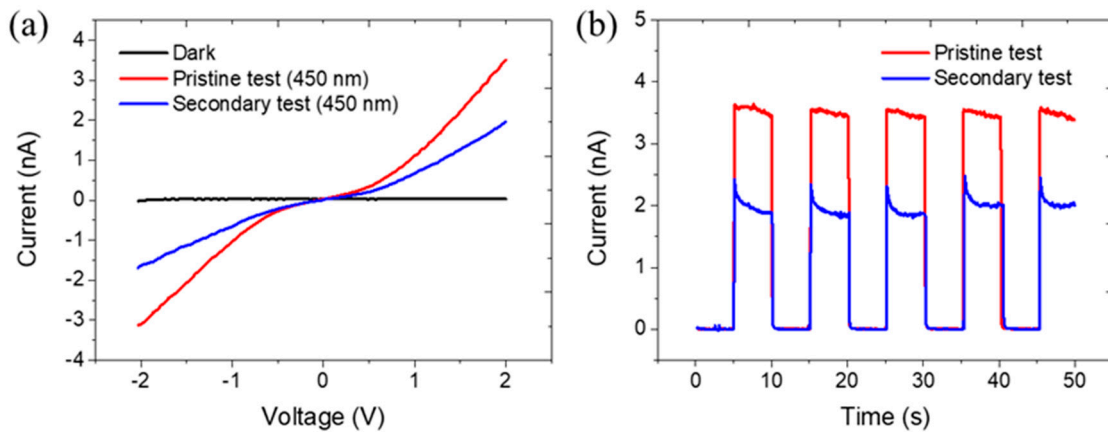

Figure S7. Stability of the GaSe/MoS<sub>2</sub> vdW heterojunction photodetector. (a) I-V curves in the dark and under incident light. (b) Temporal photoresponse of the heterojunction device at a bias of 2 V by switching 450 nm light.

## References

- 1 Kwak, J. Y.; Hwang, J.; Calderon, B.; Alsalman, H.; Munoz, N.; Schutter, B.; Spencer, M. G. Electrical Characteristics of Multilayer MoS<sub>2</sub> FET's with MoS<sub>2</sub>/Graphene Heterojunction Contacts. *Nano Letters* **2014**, *14*, 4511-4516.
- 2 Islam, A.; Lee, J.; Feng, P. X. L. Atomic Layer GaSe/MoS<sub>2</sub> van der Waals Heterostructure Photodiodes with Low Noise and Large Dynamic Range. *ACS Photonics* **2018**, *5*, 2693-2700.
- 3 Zhou, N.; Wang, R.; Zhou, X.; Song, H.; Xiong, X.; Ding, Y.; Lü, J.; Gan, L.; Zhai, T. P-GaSe/N-MoS<sub>2</sub> Vertical Heterostructures Synthesized by van der Waals Epitaxy for Photoresponse Modulation. *Small* **2018**, *14*, 1702731.
- 4 He, Z.; Guo, J.; Li, S.; Lei, Z.; Lin, L.; Ke, Y.; Jie, W.; Gong, T.; Lin, Y.; Cheng, T. *et al.* GaSe/MoS<sub>2</sub> Heterostructure with Ohmic-Contact Electrodes for Fast, Broadband Photoresponse, and Self-Driven Photodetectors. *Advanced Materials Interfaces* **2020**, *7*, 1901848.
- 5 Zou, Z.; Liang, J.; Zhang, X.; Ma, C.; Xu, P.; Yang, X.; Zeng, Z.; Sun, X.; Zhu, C.; Liang, D. *et al.* Liquid-Metal-Assisted Growth of Vertical GaSe/MoS<sub>2</sub> p-n Heterojunctions for Sensitive Self-Driven Photodetectors. *ACS Nano* **2021**, *15*, 10039-10047.
- 6 Tang, W.; Liu, C.; Wang, L.; Chen, X.; Luo, M.; Guo, W.; Wang, S.-W.; Lu, W. MoS<sub>2</sub> Nanosheet Photodetectors with Ultrafast Response. *Applied Physics Letters* **2017**, *111*, 153502.
- 7 Yin, Z.; Li, H.; Li, H.; Jiang, L.; Shi, Y.; Sun, Y.; Lu, G.; Zhang, Q.; Chen, X.; Zhang, H. Single-Layer MoS<sub>2</sub> Phototransistors. *ACS Nano* **2011**, *6*, 74-80.
- 8 Hu, P.; Wen, Z.; Wang, L.; Tan, P.; Xiao, K. Synthesis of Few-Layer GaSe Nanosheets for High Performance Photodetectors. *ACS Nano* **2012**, *6*, 5988-5994.
- 9 Huang, H.; Wang, P.; Gao, Y.; Wang, X.; Lin, T.; Wang, J.; Liao, L.; Sun, J.; Meng, X.; Huang, Z. *et al.* Highly Sensitive Phototransistor Based on GaSe Nanosheets. *Applied Physics Letters* **2015**, *107*, 143112.
